# Supplementary material
Source: publisher site journal article supplement (https://www.dovepress.com/article/214104)
Supplement: Supplementary file 1 [file get_supplementary_file.php]

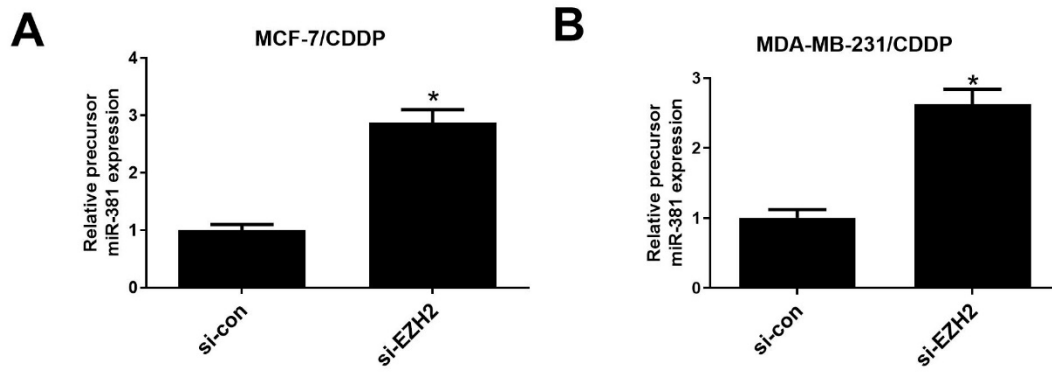

**Supplement Figure 1. EZH2 silencing increased miR-381 expression in breast cancer cells.** (A and B) qRT-PCR analysis was performed to detect precursor miR-381 expression in MCF-7/CDDP and MDA-MB-231/CDDP cells transfected with si-EZH2 or si-con.
